# Supplementary material
Source: PubMed Central journal article supplement (PMC7424552)
Supplement: NIHMS1604624-supplement-Supplemental_figures_table__references.pdf [file NIHMS1604624-supplement-Supplemental_figures_table__references.pdf]

**Oncogenic *IL7R* gain-of-function mutations in childhood T-cell acute  
lymphoblastic leukemia**

**Priscila P. Zenatti, Daniel Ribeiro, Wenqing Li, Linda Zuurbier, Milene C. Silva,  
Maddalena Paganin, Julia Tritapoe, Julie A. Hixon, André B. Silveira, Bruno A. Cardoso,  
Leonor M. Sarmento, Nádia Correia, Maria L. Toribio, Jörg Kobarg, Martin Horstmann,  
Rob Pieters, Silvia R. Brandalise, Adolfo A. Ferrando, Jules P. Meijerink, Scott K. Durum,  
J. Andrés Yunes, João T. Barata**

**Supplementary Figures 1-19, Tables 1-2 and References**

## Supplementary Figures

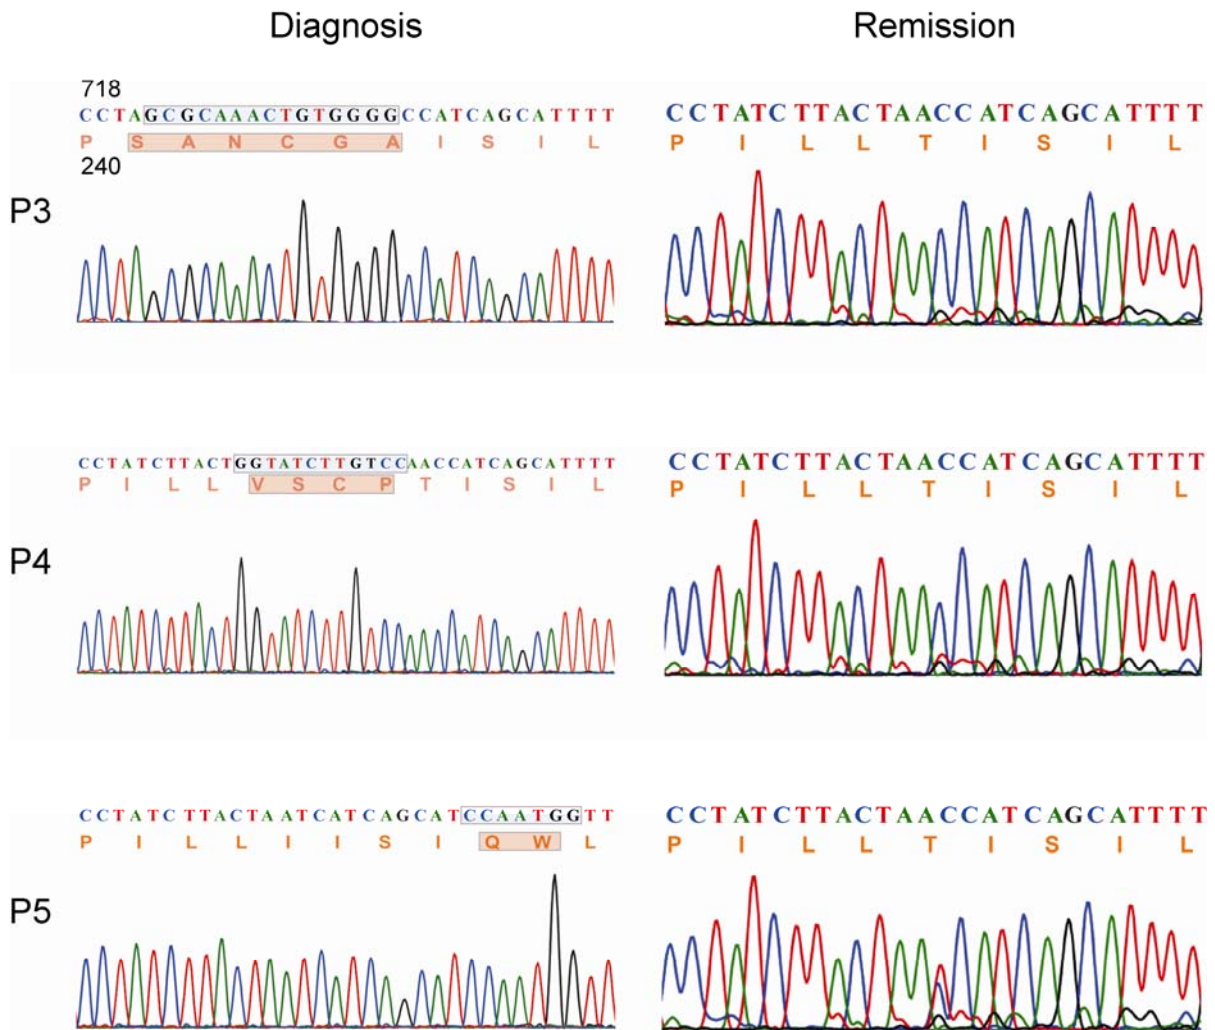

**Supplementary Figure 1. *IL7R* exon 6 somatic mutations in pediatric T-ALL.** DNA chromatograms of 3 patients from the Boldrini cohort showing the mutated sequences at diagnosis and lack of mutation at remission. The corresponding chromatograms of the remaining 2 patients from the same cohort are shown in Figure 1. Highlighted are the DNA and respective amino acid sequence alterations in each case. Patient P5 has a SNP (c.731C>T; p.T244I) in addition to the indicated QW mutation.

**a**

```

WT      PEINNSSGEMDPI LLTISILSFFSVALLVILACVLWKKKRIKPIVW
P1      PEINNSSGEMDPI LNPCLTISILSFFSVALLVILACVLWKKKRIKPIVW
P2      PEINNSSGEMDPI LLTCPTISILSFFSVALLVILACVLWKKKRIKPIVW
P3      PEINNSSGEMDPI SANCGAISILSFFSVALLVILACVLWKKKRIKPIVW
P4      PEINNSSGEMDPI LLVSCPTISILSFFSVALLVILACVLWKKKRIKPIVW
P5      PEINNSSGEMDPI LIISIQWLSFFSVALLVILACVLWKKKRIKPIVW
P6      PEINNSSGEMDPI QSPSCLIISILSFFSVALLVILACVLWKKKRIKPIVW
P7      PEINNSSGEMDPI CLEGLTISILSFFSVALLVILACVLWKKKRIKPIVW
P8      PEINNSSGEMDPI LLTISILSFFWNLLVILACVLWKKKRIKPIVW
P9      PEINNSSGEMDPI RFCPHISILSFFSVALLVILACVLWKKKRIKPIVW
P10     PEINNSSGEMDPI LKCILSFFSVALLVILACVLWKKKRIKPIVW
P11     PEINNSSGEMDPI FHPFNCGPISILSFFSVALLVILACVLWKKKRIKPIVW
P12     PEINNSSGEMDPI LLMCPTISILSFFSVALLVILACVLWKKKRIKPIVW
P13     PEINNSSGEMDPI LTISILSFFSGPSLALLVILACVLWKKKRIKPIVW
P14     PEINNSSGEMDPI RLECVTISILSFFSVALLVILACVLWKKKRIKPIVW
P15     PEINNSSGEMDPI PQGGCILSFFSVALLVILACVLWKKKRIKPIVW
P16     PEINNSSGEMDPI LQSCILSFFSVALLVILACVLWKKKRIKPIVW
P17     PEINNSSGEMDPI FPHQHCTISILSFFSVALLVILACVLWKKKRIKPIVW

```

**b**

```

WT      PEINNSSGEMDPI LLTISILSFFSVALLVILACVLWKKKRIKPIVW
P1      PEINNSSGEMDPI LNPCLTISILSFFSVALLVILACVLWKKKRIKPIVW
P2      PEINNSSGEMDPI LLTCPTISILSFFSVALLVILACVLWKKKRIKPIVW
P3      PEINNSSGEMDPI SANCGAISILSFFSVALLVILACVLWKKKRIKPIVW
P4      PEINNSSGEMDPI LLVSCPTISILSFFSVALLVILACVLWKKKRIKPIVW
P5      PEINNSSGEMDPI LLTISIQWLSFFSVALLVILACVLWKKKRIKPIVW
P6      PEINNSSGEMDPI QSPSCLIISILSFFSVALLVILACVLWKKKRIKPIVW
P7      PEINNSSGEMDPI CLEGLTISILSFFSVALLVILACVLWKKKRIKPIVW
P8      PEINNSSGEMDPI LLLTISILSFFWNLLVILACVLWKKKRIKPIVW
P9      PEINNSSGEMDPI RFCPHISILSFFSVALLVILACVLWKKKRIKPIVW
P10     PEINNSSGEMDPI LKCILSFFSVALLVILACVLWKKKRIKPIVW
P11     PEINNSSGEMDPI FHPFNCGPISILSFFSVALLVILACVLWKKKRIKPIVW
P12     PEINNSSGEMDPI LLMCPTISILSFFSVALLVILACVLWKKKRIKPIVW
P13     PEINNSSGEMDPI LLTISILSFFSGPSLALLVILACVLWKKKRIKPIVW
P14     PEINNSSGEMDPI RLECVTISILSFFSVALLVILACVLWKKKRIKPIVW
P15     PEINNSSGEMDPI PQGGCILSFFSVALLVILACVLWKKKRIKPIVW
P16     PEINNSSGEMDPI LQSCILSFFSVALLVILACVLWKKKRIKPIVW
P17     PEINNSSGEMDPI FPHQHCTISILSFFSVALLVILACVLWKKKRIKPIVW

```

**Supplementary Figure 2. The majority of unpaired cysteines created by *IL7R* mutations are predicted to localize extracellularly at the juxtamembrane-transmembrane domain interface.** Prediction of core transmembrane helices (TMH, boxed) and localization of mutated amino acids (red), using two distinct bioinformatics tools. **(a)** According to DAS<sup>1</sup> using TM-Library size of 32, the cysteine (cyan) is located extracellularly in 12 patients (6 at the TMH border) and at the extracellular border within the TMH in 2 patients. **(b)** According to TMPRED<sup>2</sup> the cysteine is located extracellularly in 11 patients (4 at the TMD border) and within the TMD in 3 patients (with 1 at the extracellular border).

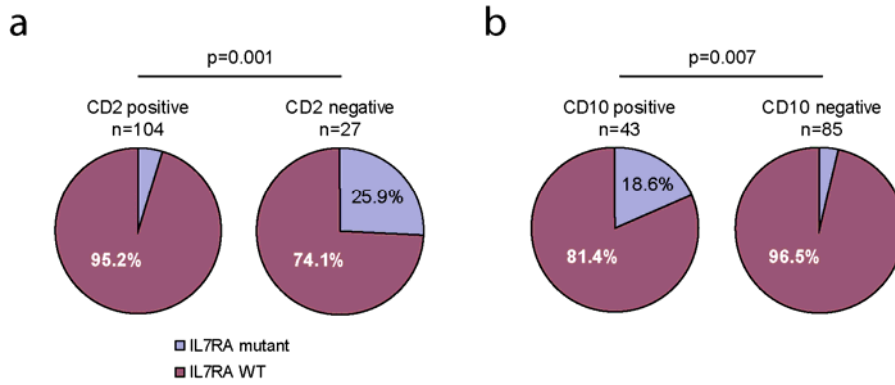

**Supplementary Figure 3. Association of *IL7R* mutations with CD2 and CD10.** Distribution of *IL7R* mutations among (a) CD2 and (b) CD10 positive *versus* negative patient samples. P values were calculated using Fisher's exact test.

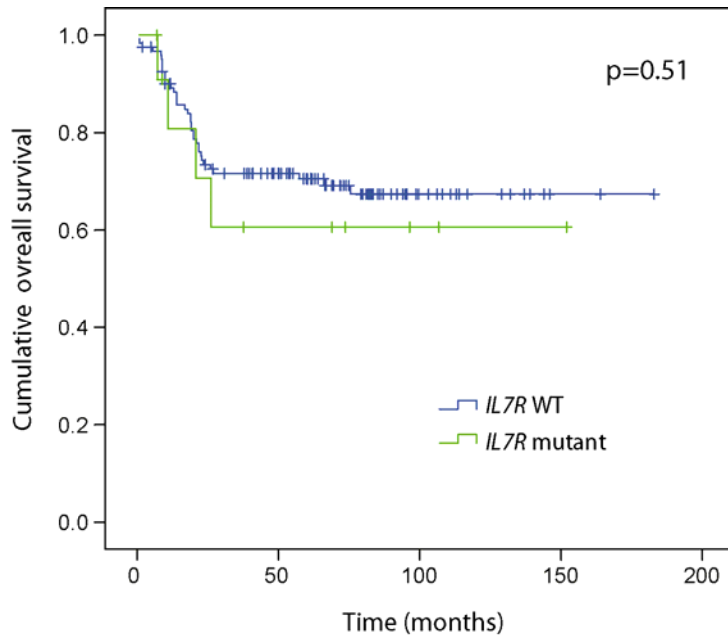

**Supplementary Figure 4. Overall survival in pediatric T-ALL cases with and without *IL7R* mutation.** Kaplan-Meier survival curve in pediatric T-ALL cases with (*IL7R* mutant, n=12) and without (*IL7R* WT, n=123) mutations in *IL7R* treated on DCOG ALL-7/-8 and -9 (n=66) and COALL-97 protocols (n=69). P value was calculated using Log-Rank test.

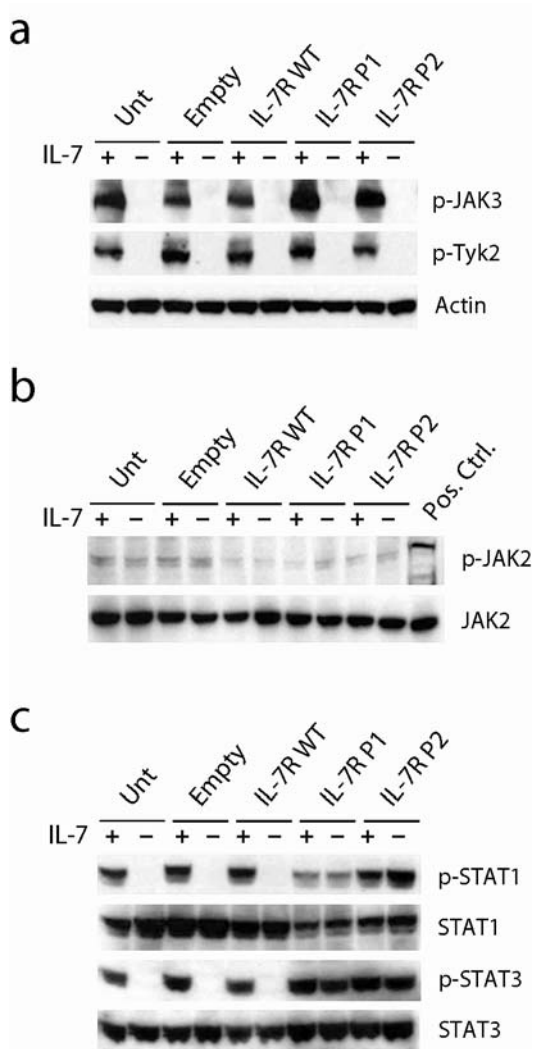

**Supplementary Figure 5. Further characterization of JAK/STAT pathway activation in IL-7- versus mutant IL7R-dependent signaling in D1 cells.** D1 cells expressing human WT or mutated (P1 and P2) IL-7R $\alpha$  were cultured without IL-7 for 4 hr, stimulated or not with IL-7 for 20 min and evaluated by immunoblot for phosphorylation of **(a)** JAK3 and TYK2, **(b)** JAK2, and **(c)** STAT1 and STAT3. Whereas *IL7R* mutations induce constitutive phosphorylation of STAT1 and STAT3, they do not drive TYK2, JAK2 or JAK3 phosphorylation.

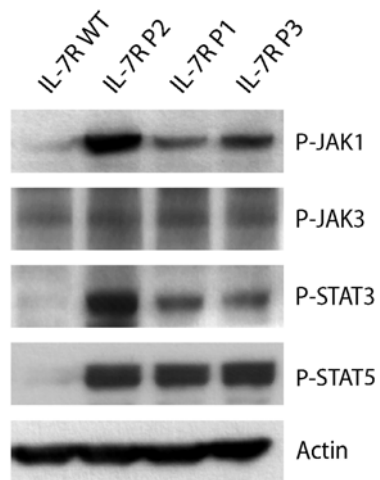

**Supplementary Figure 6. *IL7R* mutations induce JAK1, STAT3 and STAT5, but not JAK3, phosphorylation in Ba/F3 cells.** Ba/F3 cells expressing human WT or mutated (P1 and P2) IL-7R $\alpha$  were cultured without IL-3 for 4 hr and evaluated by immunoblot for phosphorylation of the indicated proteins.

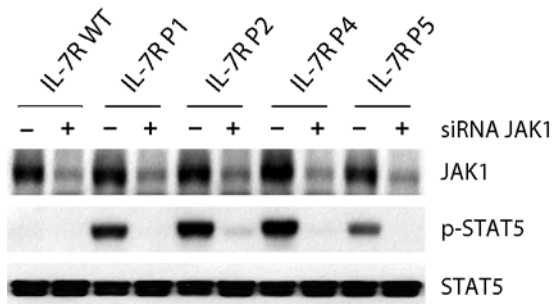

**Supplementary Figure 7. JAK1 knockdown abrogates mutant *IL7R*-mediated signaling.**

293T cells were transfected with WT or the indicated mutant *IL-7R $\alpha$*  together with siRNA against JAK1 (+) or control non-targeting siRNA (-) and evaluated after 36 hr for JAK1 expression and STAT5 phosphorylation. This blot further illustrates that P5, which displays a mutation not introducing a *de novo* cysteine (T244I, I247\_L248insQW; Table 1) is able to promote some degree of constitutive STAT5 phosphorylation, which is also sensitive to JAK1 knockdown.



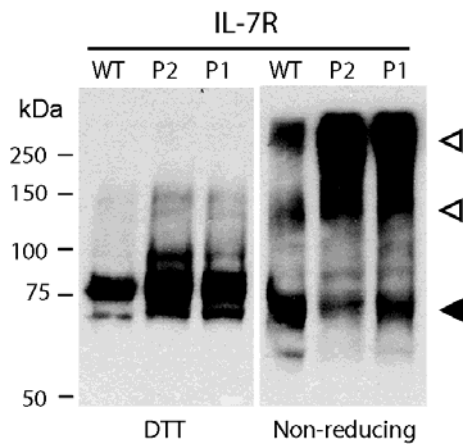

**Supplementary Figure 8. IL-7R $\alpha$  mutant, but not wild type, proteins constitutively form redox-sensitive dimers/oligomers in 293T cells.** Lysates from 293T cells expressing wild type (WT) or mutant (P1 and P2) IL-7R $\alpha$  were treated or not with the reducing agent DTT and analyzed for IL-7R $\alpha$  expression by immunoblot. The monomeric and dimeric/oligomeric forms of the receptor are denoted by black and white arrows, respectively.

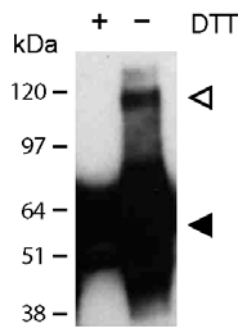

**Supplementary Figure 9. IL-7R $\alpha$  mutant proteins constitutively form redox-sensitive dimers/oligomers in *Il7r*<sup>-/-</sup> BM cells.** Lysates from BM cells from *Il7r*<sup>-/-</sup> mice transduced with P1 mutant *IL7R* were treated or not with the reducing agent DTT and analyzed for IL-7R $\alpha$  expression by immunoblot. The monomeric and dimeric forms of the receptor are denoted by black and white arrows, respectively.

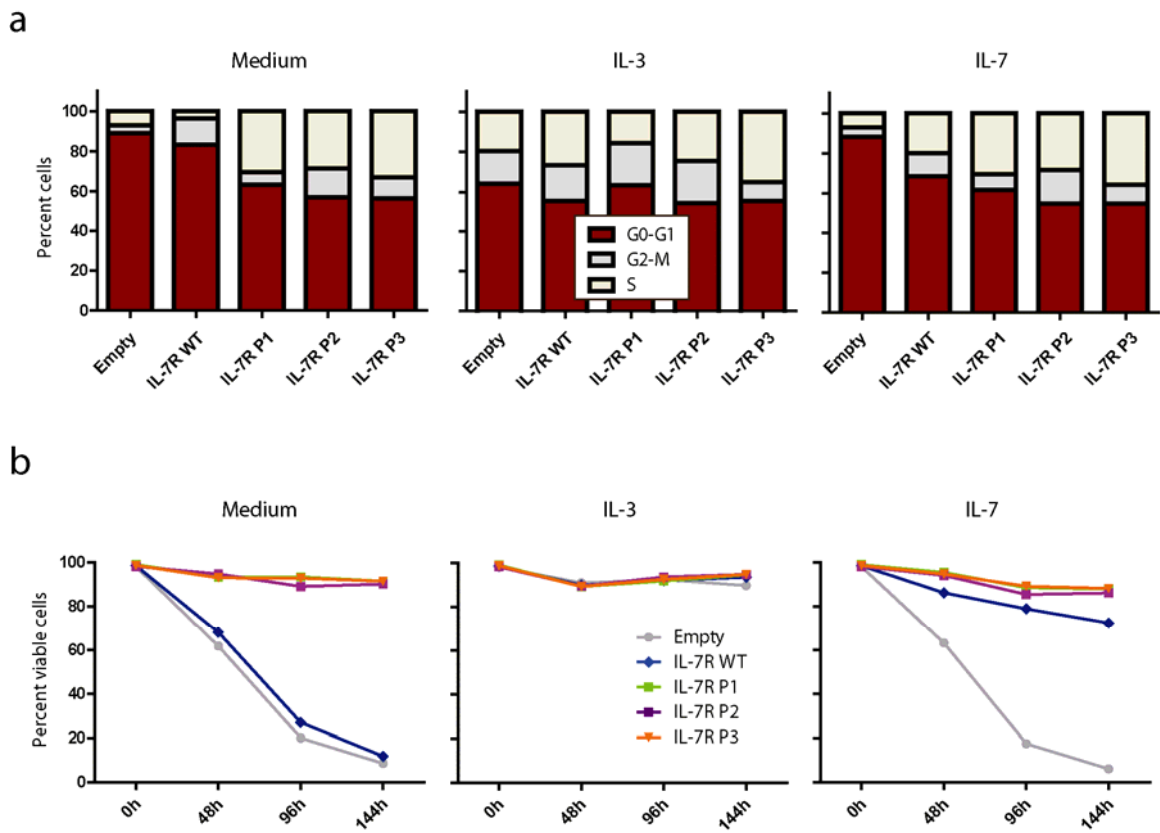

**Supplementary Figure 10. *IL7R* mutations induce cell cycle progression and viability in Ba/F3 cells independently of IL-3 or IL-7.** Ba/F3 cells stably expressing WT or mutated IL-7R $\alpha$  were cultured in the absence of growth factors or with IL-3 or IL-7. **(a)** Cell cycle was determined at 96h. **(b)** Viability was evaluated by Annexin V/ 7-AAD staining at the indicated time points. Data represent average of triplicates  $\pm$  sem.

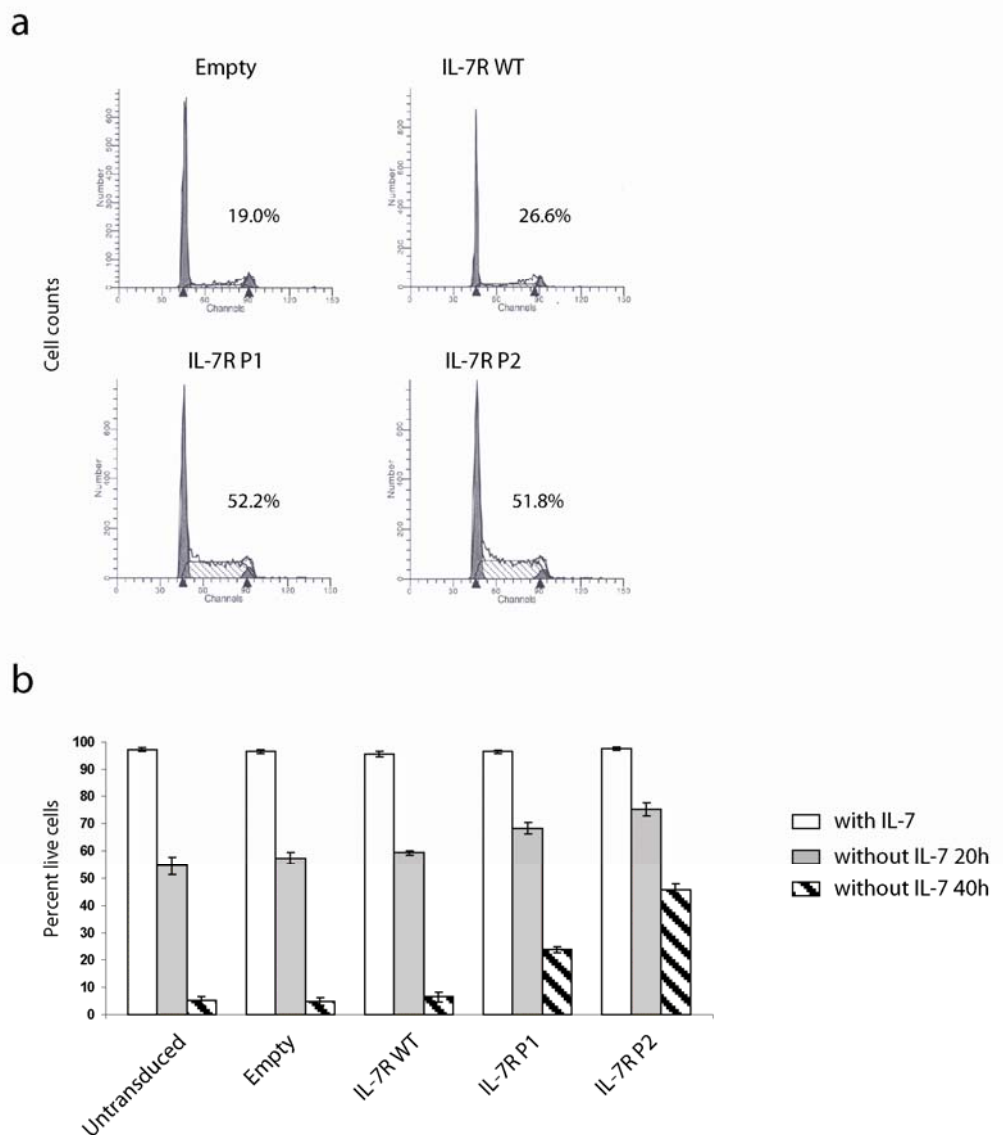

**Supplementary Figure 11. *IL7R* mutations induce cell cycle progression and viability in D1 cells independently of IL-7. (a)** D1 cells transduced with empty pMIG vector (Empty), IL-7R $\alpha$  wild type (WT), IL-7R $\alpha$  P1 or IL-7R $\alpha$  P2 were analyzed for cell cycle distribution after 24h of IL-7 deprivation. Percentage of cells in cycle (S+G2/M) is indicated for each condition. **(b)** Viability of D1 cells transduced with empty pMIG vector (Empty), IL-7R $\alpha$  WT, IL-7R $\alpha$  P1 or IL-7R $\alpha$  P2 was assessed after 20h and 40h of IL-7 deprivation. D1 cells cultured in the presence of IL-7 are shown as positive controls. Data represent average of triplicates  $\pm$  sem.

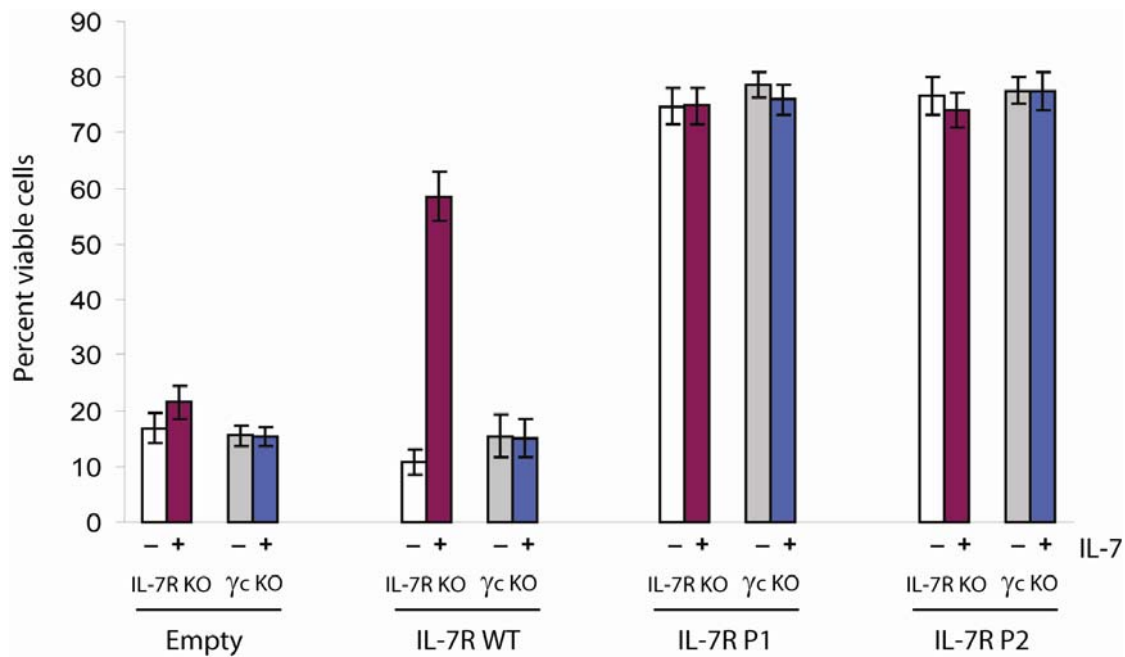

**Supplementary Figure 12. *IL7R* mutations induce cell viability independently of  $\gamma$ c expression.** Bone marrow cells from *Il7r*  $-/-$  (IL-7R KO) or *Il2rg*  $-/-$  ( $\gamma$ c KO) mice were transduced with the empty pMIG vector (Empty), *IL7R* (IL-7R) WT, *IL7R* P1 or *IL7R* P2 and cultured for 96h with or without IL-7. Viability was evaluated by Annexin V/ 7-AAD staining. Data represent average of triplicates  $\pm$  sem.

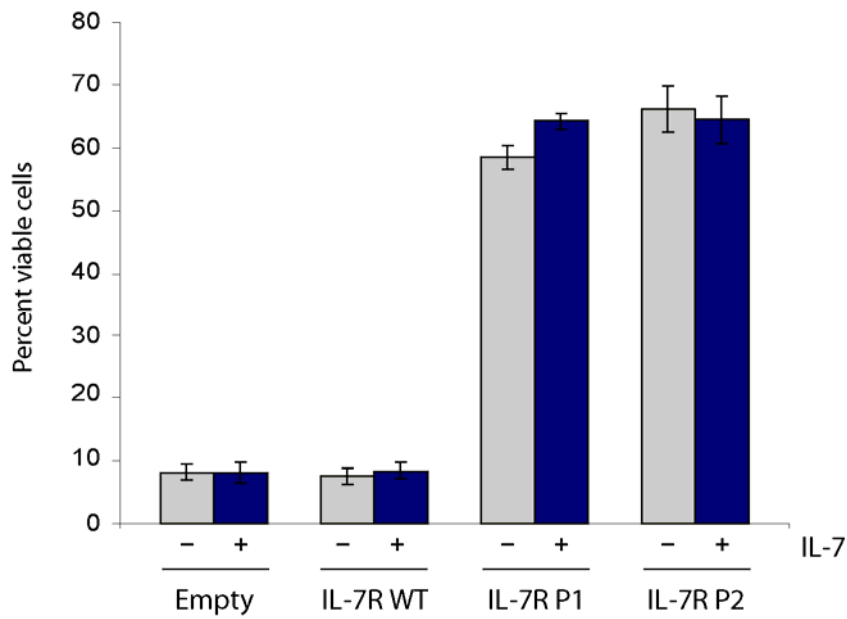

**Supplementary Figure 13. *IL7R* mutations induce cell viability independently of JAK3 expression.** Bone marrow cells from *Jak3*<sup>-/-</sup> mice were transduced with the empty pMIG vector (Empty), *IL7R* (IL-7R) WT, *IL7R* P1 or *IL7R* P2 and cultured for 96h with or without IL-7. Viability was evaluated by Annexin V/ 7-AAD staining. Mean  $\pm$  sem is indicated for triplicates of each condition.

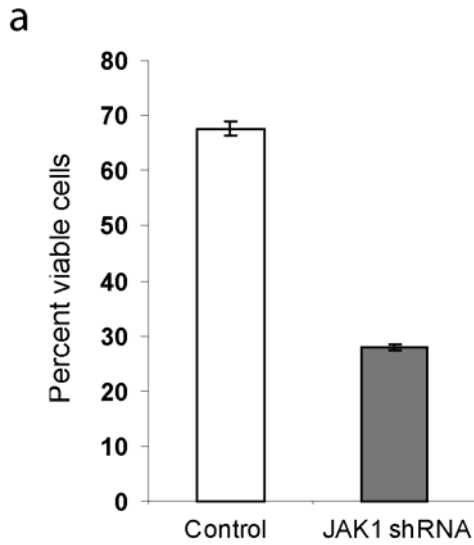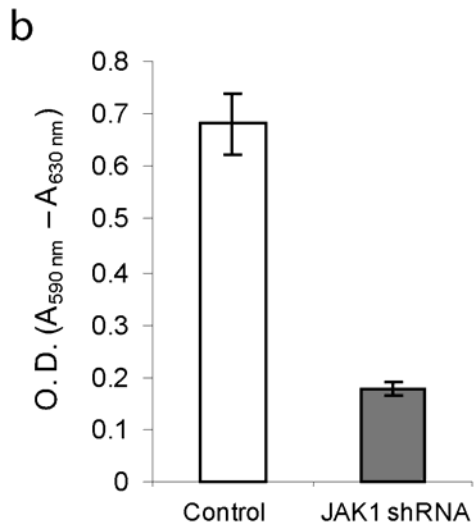

**Supplementary Figure 14. *IL7R* mutations induce cell viability and proliferation in a JAK1-dependent manner.** D1 cells expressing P1 mutant IL-7R $\alpha$  were transduced with *Jak1* or control shRNAs. After 24 hr of infection, cells were cultured with IL-7 (50 ng/ml) and puromycin (5  $\mu$ g/ml) for 48 hr, and then cultured in medium alone for 48 hr. Viability/Proliferation was analyzed by Annexin V/7-AAD staining (**a**) and by an MTT assay (**b**). Mean  $\pm$  sem is indicated for triplicates of each condition.

a

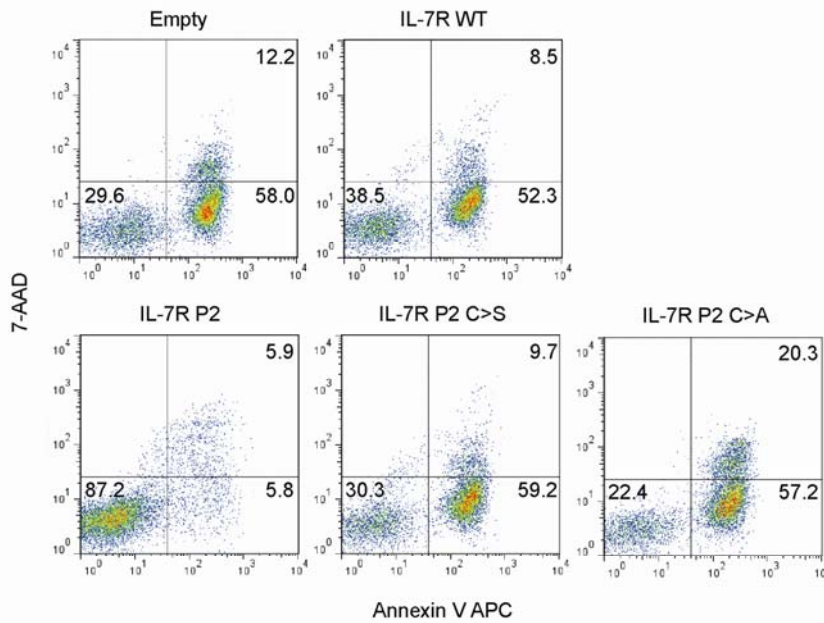

b

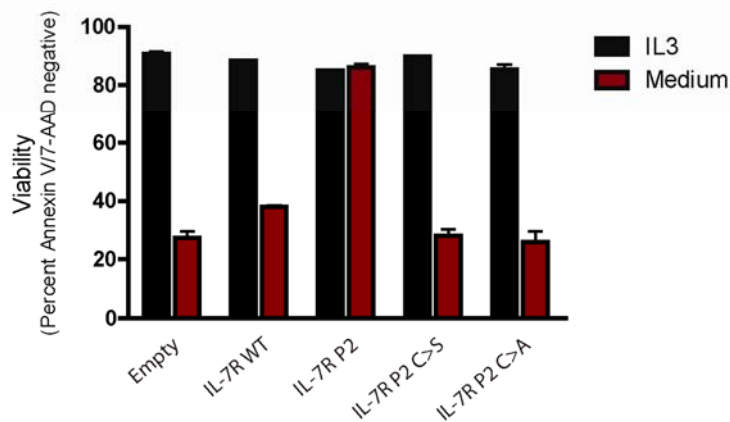

**Supplementary Figure 15. Cell viability promoted by *IL7R* mutations depends on the presence of the cysteine introduced *de novo*.** Ba/F3 cells stably transduced with pMIG vector (Empty), IL-7R $\alpha$  WT, or IL-7R $\alpha$  P2 or the indicated P2 cysteine mutants were cultured in cytokine-deprived medium or in the presence of IL-3, and analyzed for cell viability at 48h. Viability was evaluated by Annexin V/ 7-AAD staining. **(a)** Representative dot plots of cells cultured in the absence of cytokines. **(b)** Mean  $\pm$  sem of duplicates of each condition.



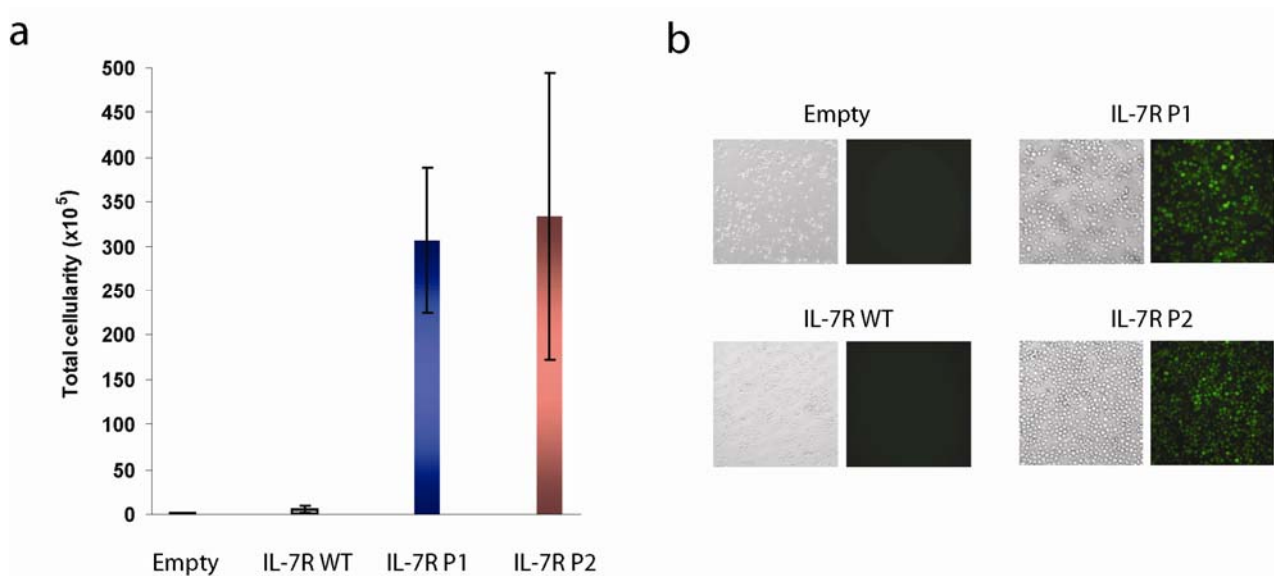

**Supplementary Figure 16. Lymph node and liver infiltration in *Rag1*<sup>-/-</sup> mice subcutaneously injected with D1 cells. (a)** Lymph node cellularity and **(b)** representative phase contrast and fluorescence images of lymph nodes from *Rag1*<sup>-/-</sup> mice 20 days post subcutaneous transplantation of D1 cells. Mean  $\pm$  sem is indicated for triplicates of each condition.

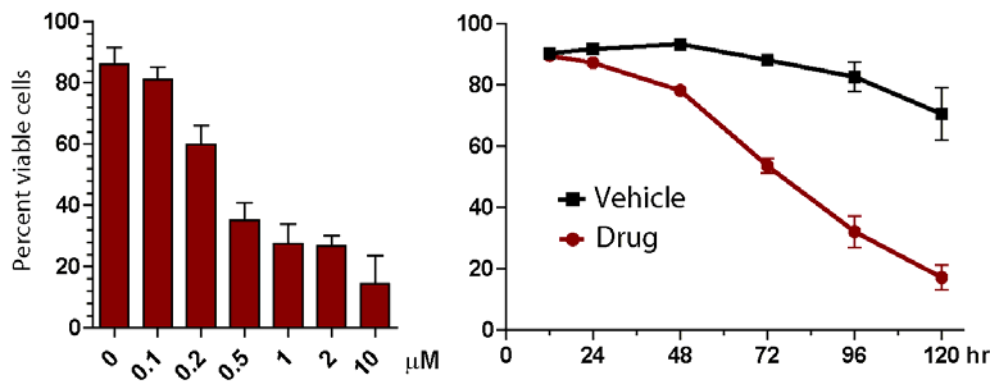

**Supplementary Figure 17. JAK inhibition reduces cell viability of P2 mutant IL-7R $\alpha$ -expressing Ba/F3 cells.** Ba/F3 cells stably expressing mutant IL-7R $\alpha$  P2 were cultured in medium alone with or without JAK inhibitor I at the indicated doses for 72 hr (left) or for the indicated culture periods at 1 $\mu$ M (right) and analyzed for cell viability by flow cytometry. Mean  $\pm$  sem is indicated for triplicates of each condition.

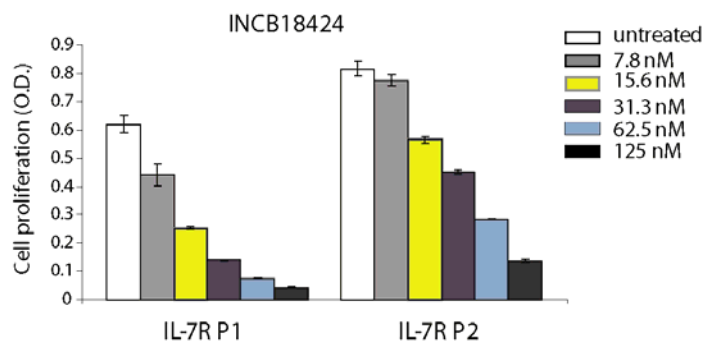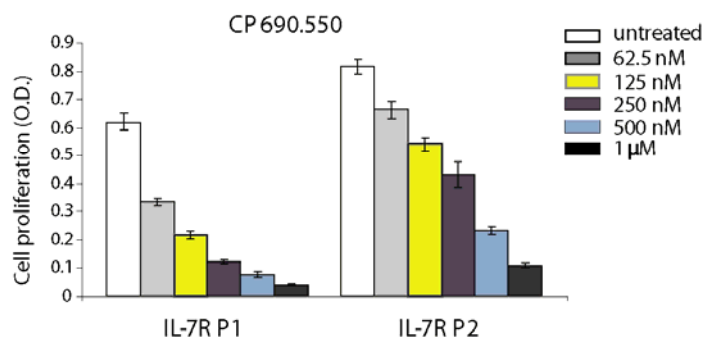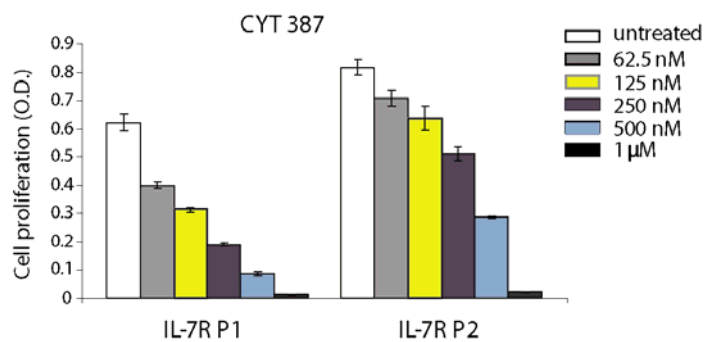

**Supplementary Figure 18. JAK pharmacological inhibitors in clinical use reduce cell viability/proliferation of mutant IL-7R $\alpha$ -expressing D1 cells.** D1 cells stably expressing mutant IL-7R $\alpha$  were cultured in medium deprived of IL-7 with or without the indicated clinically-relevant JAK inhibitors and viability/proliferation (shown as O.D.) was determined at 48 hr using an MTT assay. Mean  $\pm$  sem is indicated for triplicates of each condition.

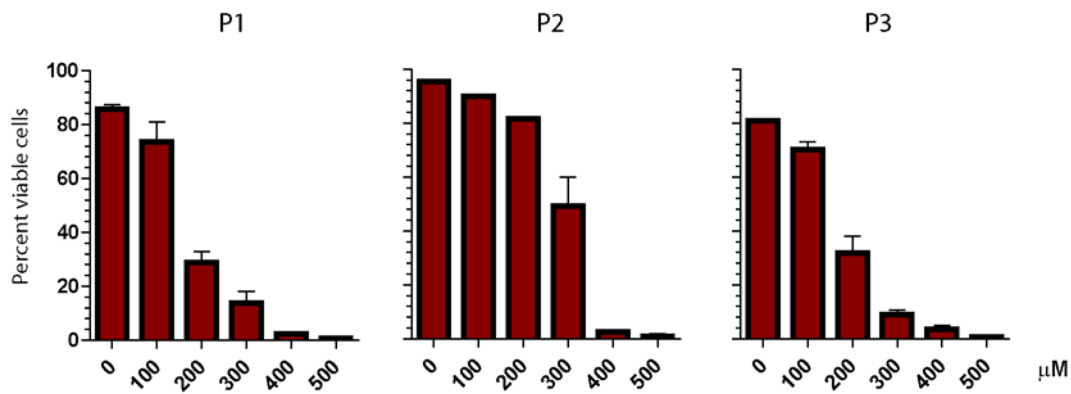

**Supplementary Figure 19. Dose-dependent cell death induced by STAT5 inhibition in P1, P2 and P3 mutant IL-7R $\alpha$ -expressing Ba/F3 cells.** Ba/F3 cells stably expressing the indicated mutant IL-7R $\alpha$  were cultured in medium alone with or without STAT5 inhibitor at the indicated concentrations for 72 hr and analyzed for cell viability by flow cytometry. Mean  $\pm$  sem is indicated for triplicates of each condition.

**Supplementary Table 1. Differentially expressed genes in IL7R mutant versus IL7R wild type pediatric T-ALLs (LIMMA analysis; cut-off FDR p-value=0.05).**

| Gene Title                                                                                            | Gene Symbol                          | ID           | P.Value  | adj.P.Val | logFC    |
|-------------------------------------------------------------------------------------------------------|--------------------------------------|--------------|----------|-----------|----------|
| similar to hypothetical protein MGC42630 /// hypothetical protein MGC42630 /// hypothetical LOC504188 | LOC158318 /// MGC42630 /// LOC504188 | 1553590_at   | 3,77E-09 | 0,000103  | 1,284223 |
| proprotein convertase subtilisin/kexin type 6                                                         | PCSK6                                | 207414_s_at  | 3,54E-09 | 0,000103  | 1,435284 |
| ---                                                                                                   | ---                                  | 220701_at    | 2,07E-08 | 0,000378  | -0,86895 |
| carboxypeptidase A6                                                                                   | CPA6                                 | 1552511_a_at | 1,04E-07 | 0,001417  | 1,247438 |
| protein kinase (cAMP-dependent, catalytic) inhibitor alpha                                            | PKIA                                 | 204612_at    | 1,62E-07 | 0,001478  | -1,70916 |
| interleukin 17D                                                                                       | IL17D                                | 227401_at    | 1,38E-07 | 0,001478  | -1,51526 |
| dipeptidylpeptidase 4 (CD26, adenosine deaminase complexing protein 2)                                | DPP4                                 | 203716_s_at  | 2,35E-07 | 0,001839  | 2,149853 |
| BAI1-associated protein 2                                                                             | BAIAP2                               | 1556145_a_at | 3,57E-07 | 0,002443  | 0,85672  |
| Aryl hydrocarbon receptor                                                                             | AHR                                  | 1559035_a_at | 4,21E-07 | 0,002557  | 1,263743 |
| hypothetical protein LOC253982                                                                        | LOC253982                            | 214993_at    | 6,09E-07 | 0,003328  | 0,657823 |
| chromosome 2 open reading frame 23                                                                    | C2orf23                              | 204365_s_at  | 7,23E-07 | 0,003592  | -0,77833 |
| toll-interleukin 1 receptor (TIR) domain containing adaptor protein                                   | TIRAP                                | 1554091_a_at | 1,34E-06 | 0,005045  | -1,07611 |
| tight junction protein 3 (zona occludens 3)                                                           | TJP3                                 | 213412_at    | 1,24E-06 | 0,005045  | 1,056165 |
| hypothetical protein FLJ13841                                                                         | FLJ13841                             | 219995_s_at  | 1,38E-06 | 0,005045  | 1,495932 |
| olfactory receptor, family 51, subfamily B, member 5                                                  | OR51B5                               | 234775_at    | 1,14E-06 | 0,005045  | -0,86369 |
| suppressor of cytokine signaling 2                                                                    | Socs2                                | 203372_s_at  | 1,96E-06 | 0,006691  | 2,636933 |
| CDNA clone IMAGE:5265747                                                                              | ---                                  | 1555994_at   | 3,03E-06 | 0,009742  | 0,923981 |
| F-box and leucine-rich repeat protein 16                                                              | FBXL16                               | 227641_at    | 3,73E-06 | 0,011327  | -1,11153 |
| chromosome 1 open reading frame 142                                                                   | C1orf142                             | 230810_at    | 4,01E-06 | 0,011552  | -0,71443 |
| dipeptidylpeptidase 4 (CD26, adenosine deaminase complexing protein 2)                                | DPP4                                 | 211478_s_at  | 4,52E-06 | 0,012143  | 2,123167 |
| dehydrogenase/reductase (SDR family) member 9                                                         | DHRS9                                | 219799_s_at  | 4,66E-06 | 0,012143  | -0,69388 |
| suppressor of cytokine signaling 2                                                                    | Socs2                                | 203373_at    | 5,33E-06 | 0,01317   | 2,454919 |
| EPH receptor B2                                                                                       | EPHB2                                | 234158_at    | 5,54E-06 | 0,01317   | 0,806845 |
| spondin 1, extracellular matrix protein                                                               | SPON1                                | 209436_at    | 8,37E-06 | 0,018298  | 1,19454  |
| Acyl-Coenzyme A oxidase 3, pristanoyl                                                                 | ACOX3                                | 243817_at    | 8,07E-06 | 0,018298  | -0,77482 |
| spondin 1, extracellular matrix protein                                                               | SPON1                                | 213994_s_at  | 9,16E-06 | 0,019257  | 1,870146 |
| Xg blood group (pseudoautosomal boundary-divided on the X chromosome)                                 | XG                                   | 1563420_at   | 1,23E-05 | 0,021793  | 1,451362 |
| spondin 1, extracellular matrix protein                                                               | SPON1                                | 209437_s_at  | 1,15E-05 | 0,021793  | 1,246723 |
| Protein kinase C, epsilon                                                                             | PRKCE                                | 216753_at    | 1,24E-05 | 0,021793  | -0,81188 |
| hypothetical protein MGC42630                                                                         | MGC42630                             | 227563_at    | 1,23E-05 | 0,021793  | 0,952581 |
| zinc finger protein 335                                                                               | ZNF335                               | 78330_at     | 1,18E-05 | 0,021793  | -0,95327 |
| hypothetical gene supported by AK091454                                                               | LOC285382                            | 242447_at    | 1,37E-05 | 0,023389  | -0,8158  |
| Ryanodine receptor 3                                                                                  | RYR3                                 | 241901_at    | 1,52E-05 | 0,025124  | -0,944   |
| v-ets erythroblastosis virus E26 oncogene homolog 2 (avian)                                           | ETS2                                 | 201329_s_at  | 1,57E-05 | 0,025297  | 1,003391 |
| LIM homeobox 6                                                                                        | LHX6                                 | 224556_s_at  | 1,62E-05 | 0,025355  | 0,707453 |
| growth arrest-specific 2                                                                              | GAS2                                 | 205848_at    | 1,7E-05  | 0,02579   | 2,442036 |
| SH3-domain GRB2-like 3                                                                                | ---                                  | 230959_at    | 1,84E-05 | 0,027152  | 1,09072  |
| Death-associated protein kinase 1                                                                     | DAPK1                                | 237409_at    | 2,1E-05  | 0,030229  | 1,255728 |
| family with sequence similarity 49, member A /// family with sequence similarity 49, member A         | FAM49A                               | 208092_s_at  | 2,22E-05 | 0,03109   | -0,89989 |
| hypothetical gene supported by BC028053                                                               | LOC440569                            | 1569386_at   | 2,34E-05 | 0,03183   | 0,901727 |
| cysteinyl leukotriene receptor 2                                                                      | CYSLTR2                              | 220813_at    | 2,5E-05  | 0,03183   | 1,224922 |
| protocadherin beta 13                                                                                 | PCDH13                               | 221450_x_at  | 2,41E-05 | 0,03183   | 0,676771 |
| Adaptor-related protein complex 4, epsilon 1 subunit                                                  | AP4E1                                | 241174_at    | 2,46E-05 | 0,03183   | -0,90015 |
| syndecan binding protein (syntenin) 2                                                                 | SDCBP2                               | 233565_s_at  | 2,62E-05 | 0,032525  | -0,83116 |
| src family associated phosphoprotein 1                                                                | SCAP1                                | 205790_at    | 2,74E-05 | 0,032776  | -1,33791 |
| homeo box A9                                                                                          | HoxA9                                | 209905_at    | 2,82E-05 | 0,032776  | 2,043246 |
| Rho GTPase activating protein 10                                                                      | ARHGAP10                             | 239567_at    | 2,78E-05 | 0,032776  | -1,09894 |
| Rho GTPase-activating protein                                                                         | RICS                                 | 203431_s_at  | 2,9E-05  | 0,033081  | -1,34478 |
| enhancer of zeste homolog 2 (Drosophila)                                                              | EZH2                                 | 203358_s_at  | 3,19E-05 | 0,034046  | -0,65741 |
| defensin, alpha 6, Paneth cell-specific                                                               | DEFA6                                | 207814_at    | 3,3E-05  | 0,034046  | 1,288429 |
| chromosome 1 open reading frame 105                                                                   | C1orf105                             | 214357_at    | 3,17E-05 | 0,034046  | -1,08944 |
| brain and acute leukemia, cytoplasmic                                                                 | BAALC                                | 218899_s_at  | 3,24E-05 | 0,034046  | 1,652154 |
| chromosome 1 open reading frame 116                                                                   | C1orf116                             | 219856_at    | 3,17E-05 | 0,034046  | 0,519867 |
| Potassium voltage-gated channel, KQT-like subfamily, member 1                                         | KCNQ10T1                             | 237249_at    | 3,36E-05 | 0,034049  | 0,77784  |
| olfactory receptor, family 5, subfamily U, member 1                                                   | OR5U1                                | 234545_at    | 3,57E-05 | 0,035492  | -0,88816 |
| hypothetical gene LOC133874                                                                           | LOC133874                            | 1554115_at   | 3,76E-05 | 0,036728  | -0,59776 |
| spondin 1, extracellular matrix protein                                                               | SPON1                                | 213993_at    | 3,88E-05 | 0,036764  | 1,5679   |
| chromosome 1 open reading frame 165                                                                   | C1orf165                             | 219670_at    | 3,97E-05 | 0,036764  | -0,95235 |
| Hypothetical protein LOC441168                                                                        | LOC441168                            | 228362_s_at  | 4,02E-05 | 0,036764  | 0,930994 |
| Solute carrier family 35, member F3                                                                   | SLC35F3                              | 231520_at    | 4,03E-05 | 0,036764  | 0,83601  |
| Protein kinase (cAMP-dependent, catalytic) inhibitor alpha                                            | PKIA                                 | 1563217_at   | 4,17E-05 | 0,037264  | -1,61645 |
| myosin, heavy polypeptide 14                                                                          | MYH14                                | 217660_at    | 4,23E-05 | 0,037264  | 0,906789 |
| CDNA clone IMAGE:4828909                                                                              | ---                                  | 1563283_at   | 4,32E-05 | 0,037511  | -1,00588 |
| down-regulated in gastric cancer GDDR                                                                 | GDDR                                 | 238222_at    | 4,48E-05 | 0,038288  | -0,75619 |
| v-src sarcoma (Schmidt-Ruppin A-2) viral oncogene homolog (avian)                                     | SRC                                  | 1558211_s_at | 4,58E-05 | 0,038522  | -0,7583  |
| EPH receptor B2                                                                                       | EPHB2                                | 210651_s_at  | 4,67E-05 | 0,038692  | -0,68255 |
| CDNA clone IMAGE:4694535                                                                              | ---                                  | 1564760_at   | 4,79E-05 | 0,039111  | -0,8968  |
| Chromosome 2 open reading frame 27                                                                    | C2orf27                              | 230336_at    | 4,9E-05  | 0,039372  | 1,039966 |
| Vacuolar protein sorting 13A (yeast)                                                                  | VPS13A                               | 1570295_at   | 4,99E-05 | 0,039466  | -0,87781 |
| ethanolamine kinase 2                                                                                 | ETNK2                                | 219268_at    | 5,05E-05 | 0,039466  | -0,76813 |
| uronyl-2-sulfotransferase                                                                             | UST                                  | 205138_s_at  | 5,16E-05 | 0,039748  | 0,855043 |
| hypothetical protein LOC144481                                                                        | LOC144481                            | 1559315_s_at | 5,42E-05 | 0,040594  | 1,169696 |
| thioesterase domain containing 1                                                                      | THEDC1                               | 222945_x_at  | 5,36E-05 | 0,040594  | -1,00074 |
| UTP15, U3 small nucleolar ribonucleoprotein, homolog (yeast)                                          | FLJ12787                             | 221038_at    | 5,56E-05 | 0,041075  | -0,9038  |
| Similar to ZNF43 protein                                                                              | ---                                  | 1565748_at   | 5,74E-05 | 0,041867  | -0,69271 |
| SLAM family member 6                                                                                  | SLAMF6                               | 1552497_a_at | 6,07E-05 | 0,043684  | -0,6851  |
| Four and a half LIM domains 2                                                                         | FHL2                                 | 1557274_at   | 6,62E-05 | 0,046982  | -0,70083 |
| multimerin 2                                                                                          | MMRN2                                | 219091_s_at  | 6,8E-05  | 0,047662  | -0,67255 |
| hypothetical gene supported by AK091527                                                               | FLJ34208                             | 1566761_a_at | 7,11E-05 | 0,048614  | -0,64129 |
| Amyloid beta (A4) precursor-like protein 2                                                            | APLP2                                | 208701_at    | 7,05E-05 | 0,048614  | -0,91316 |

**Supplementary Table 2.** Primers used for *IL7R*, *JAK1* (JH2), and *JAK3* (JH2) RT-PCR, sequencing and cloning.

| Primer       | Sequence (5' →3')                          | 5'-3' position (size)           | Fragment size |
|--------------|--------------------------------------------|---------------------------------|---------------|
| IL7R_exF     | CCCTCCCTTCTCTTACTCTCA                      | 13 – 34 (22) <sup>a</sup>       | 589 bp        |
| IL7R_exR     | TGGCGGTAAGCTACATCGTG                       | 601 – 582 (20) <sup>a</sup>     |               |
| IL7R_trF     | AGCCAATGACTTTGTGGTGAC                      | 515 – 535 (21) <sup>a</sup>     | 606 bp        |
| IL7R_trR     | ACATCCCCTCCAAGCCTCT                        | 1120 – 1102 (19) <sup>a</sup>   |               |
| IL7R_inF     | CAGAGGCTTGGAGGGGATGT                       | 1101 – 1120 (20) <sup>a</sup>   | 416 bp        |
| IL7R_inR     | AATCATCTTTGTGCTCACGGT                      | 1516 – 1495 (22) <sup>a</sup>   |               |
| IL7R_hapF    | CACTCACTGACCTGTGCTTTT                      | 246 – 266 (21) <sup>a</sup>     | 673bp         |
| IL7R_hapR    | GGAGACTGGGCCATACGATA                       | 918 – 899 (20) <sup>a</sup>     |               |
| IL7R_ex8F    | TCCTATCTTACTAACCATCAGCATTT                 | 806 – 831 (26) <sup>a</sup>     | 788bp         |
| IL7R_ex8R    | GACTGTGTAGTGGGGTTTTGCT                     | 1593 – 1572 (22) <sup>a</sup>   |               |
| Jak1JH2_aF   | AGGAGTGGCAGCCCGTCTA                        | 1934 – 1952 (19) <sup>a</sup>   | 485 bp        |
| Jak1JH2_aR   | GGCCAGGAGGAGTTTTTAGT                       | 2418 – 2398 (21) <sup>a</sup>   |               |
| Jak1JH2_bF   | AATTCAAAGTTGCCAAACAGCT                     | 2321 – 2342 (22) <sup>a</sup>   | 527 bp        |
| Jak1JH2_bR   | GTCCACTTCAGTTGCTGGTTTT                     | 2847 – 2826 (22) <sup>a</sup>   |               |
| Jak3JH2_aF   | CGTAGATGGGGTGGCAGTG                        | 1489 – 1507 (19) <sup>a</sup>   | 526 bp        |
| Jak3JH2_aR   | CAGATAGTTGAGGGCGTAGGC                      | 2014 – 1994 (21) <sup>a</sup>   |               |
| Jak3JH2_bF   | GCCTACGCCCTCAACTATCTG                      | 1994 – 2014 (21) <sup>a</sup>   | 523 bp        |
| Jak3JH2_bR   | CACCATTCCACAGCCCATC                        | 2516 – 2498 (19) <sup>a</sup>   |               |
| IL7R_exon6F  | CAAAGCACCTGAGACCCTAC                       | 17400 – 17420 (21) <sup>b</sup> | 278bp         |
| IL7R_exon6R  | TTCGTGAAATGCCTTAATCCC                      | 17667 – 17657 (21) <sup>b</sup> |               |
| IL7R 3U32    | GTGGTACCCTCCCTCCCTTCTCTTACTCTCA            | (32) <sup>c</sup>               | 1470bp        |
| IL7R 1434L39 | GGGCCCGGGGTTTTGGTAGAAGCTGGACATGGTGACATA    | (39) <sup>c</sup>               |               |
| hIL7R5'BglII | CGTACAGATCTCCCTTCTCTTACTCTCA               | (29) <sup>c</sup>               | 1476bp        |
| hIL7R3'EcoRI | TACGGAATCTAGCCGGGGTTTTGGTA                 | (27) <sup>c</sup>               |               |
| hIL7R_cP1s   | AGATGGATCCTATCTTAAACCCAaGCCTAACCATCAGCAT   | 799 – 829 (40) <sup>c</sup>     | 151bp         |
| hIL7R_cP2s   | AGATGGATCCTATCTTACTAACTcTCCCACCATCAGCATTTT | 799 - 832 (43) <sup>c</sup>     |               |
| hIL7R_cP2a   | AGATGGATCCTATCTTACTAACTgcTCCCACCATCAGCATTT | 799 – 831 (42)                  |               |
| hIL7R_BbsI   | CAAAGATGTTCCAGAGTCTTCTTATGATCGGGGAGACTG    | 949 – 911 (39)                  |               |

<sup>a</sup> Positions according to NCBI reference of coding sequences NM\_002185.2 (*IL7R*), NM\_002227.2 (*JAK1*), NM\_000215.3 (*JAK3*).

<sup>b</sup> Positions refer to flanking intronic regions of exon 6 according to NCBI reference of genomic sequence NT\_006576.16

<sup>c</sup> The cloning restriction sites are underlined. Nucleotide changes for site-directed mutagenesis are noted in small caps. Positions refer to hybridization in the coding sequences of NM\_002185.2 (*IL7R*).

## Supplementary References

1. Cserzo, M., Eisenhaber, F., Eisenhaber, B. & Simon, I. On filtering false positive transmembrane protein predictions. *Protein Eng* **15**, 745-52 (2002).
2. Hofmann, K. & Stoffel, W. TMbase: A database of membrane spanning proteins segments. *Biol Chem Hoppe-Seyler* **374**, 166 (1993).
